# Supplementary material for: Bacterial coinfection and antibiotic resistance in hospitalized COVID-19 patients: a systematic review and meta-analysis
Source: PeerJ. 2023 Apr 26;11:e15265. doi: 10.7717/peerj.15265 (PMC10148641; doi:10.7717/peerj.15265)
Supplement: Supplemental Information 1 [file peerj-11-15265-s001.xlsx]

## Sheet: Sheet1
ID	Author	year	country	study objective	participant	duration study	study design	sampling	sample size	co-infection	setting	Age (mean/median)	N_patient coinfection	prevalence bacterial co-infection	SE co-infection	n_isolation	A. baumannii	prevalence AB	SE AB	K. pneumoniae	prevalence KP	SE KP	P. aeruginosa	prevalence PA	SE PA	S. aureus	prevalence SA	SE SA	E. coli	prevalence EC	SE EC	MRSA	prevalence MRSA	SE MRSA	ESBL	prevalence ESBL	SE ESBL	CRE/CRPK	prevalence CRE	SE CRE	CRAB/spp	prevalence CRAB	SE CRAB	CRPA	prevalence CRPA	SE CRPA	VRE	prevalence VRE	SE VRE
1	Ahmed	2022	Pakistan	to see the prevalence of bacterial co-infections and the AMR rates among different isolated bacteria	hospitalized COVID-19 patients	16 October 2021 to 21 December 2021	retrospective cohort study	All COVID-19 patients	1165	various bacterial infections	unspecific ward	<30, 30-50, >50	423	0.36309	0.0140891	1165	55	0.0472103	0.00621375	101	0.0866953	0.00824409	61	0.0523605	0.0065262	34	0.0291845	0.00493153	133	0.114163	0.00931701
2	Alqahtani	2022	Saudi Arabia	studied the effects of bacterial coinfections on intensive care unit (ICU)-admitted patients with COVID-19 in Asir province, Saudi Arabia	(ICU)-admitted patients with COVID-19	1 April 2020 and 1 June 2020	retrospective study	All COVID-19 patients	34	bacterial coinfection	ICU	average 64	18	0.529412	0.0856008	45	3	0.0666667	0.0371849	12	0.266667	0.0659218	NA			1	0.0222222	0.0219739	1	0.0222222	0.0219739
3	Baggs	2022	US	described bacterial/fungal co-infections and antibiotic resistant infections among inpatients diagnosed with COVID-19 and compared findings with inpatients diagnosed with influenza-like-illness	inpatients diagnosed with COVID-19	February–April 2020	retrospective study	All COVID-19 patients	206465	bacterial coinfection	unspecific ward	adult and pediatric	206465	1	0	206465	NA			2530	0.0122539	0.000242123	2674	0.0129513	0.00024883	4548	0.0220279	0.000323018	6365	0.0308285	0.000380411				1692	0.00819509	0.000198412	119	0.000576369	5.28204e-05	68	0.000329354	3.99334e-05	350	0.0016952	9.05356e-05	469	0.00227157	0.000104772
4	Bahçe	2022	Turkey	determined the bacterial agents isolated from endotracheal aspirate (ETA) cultures of Covid-19 general intensive care patients and evaluated the antibiotic resistance profiles of common bacterial agents compared to the pre-pandemic period	Covid-19 general intensive care patients	April 1, 2020–March 31, 2021	retrospective study	All COVID-19 patients	602	endotracheal aspirate cultures	ICU	mean 70.31	67	0.111296	0.012818	87	47	0.54023	0.0534318	9	0.103448	0.0326505	6	0.0689655	0.0271668	2	0.0229885	0.0160674	1	0.0114943	0.011428
5	Baiou	2021	Qatar	investigated the clinical characteristics and risk factors for the isolation of multi-drug-resistant (MDR) Gram-negative bacteria (GNB) from critically ill COVID-19 patients	critically ill COVID-19 patients	1st March 2020 to 30th June 2020	retrospective study	All COVID-19 patients	1231	multi-drug-resistant (MDR) Gram-negative bacteria	ICU	38-61	78	0.0633631	0.00694344	98	NA			23	0.234694	0.042811	7	0.0714286	0.0260154	53	0.540816	0.0503391	12	0.122449	0.0331132							8	0.0816327	0.0276584
6	Baskaran	2021	England	To describe the incidence and nature of co- infection in critically ill adults with COVID-19 infection in England.	critically ill adults with COVID-19	up to 18 May 2020	retrospective study	All COVID-19 patients	254	bacterial coinfection	ICU	18-84	83	0.326772	0.0294297	124	2	0.016129	0.0113126	2	0.016129	0.0113126	6	0.0483871	0.0192701	6	0.0483871	0.0192701	20	0.16129	0.0330293	4	0.0322581	0.0158668				2	0.016129	0.0113126	1	0.00806452	0.00803193	6	0.0483871	0.0192701
7	Bazaid	2022	Saudi Arabia	to investigate the prevalence of bacterial coinfections and associated antibiotic resistance profiles among hospitalised COVID-19 patients	hospitalised COVID-19 patients	aug 2020-april 2021	retrospective cohort study	All COVID-19 patients	108	bacterial coinfection	unspecific ward	25-65	73	0.675926	0.045036	129	42	0.325581	0.0412572	57	0.44186	0.0437239	10	0.0775194	0.0235445	NA			16	0.124031	0.0290212
8	Bentivegna	2021	Italy	to identify if the incidence of MDR bacterial infections while using pandemic related preventive measures	COVID‑19 patients	2020	retrospective case-control study	All COVID-19 patients	150	bacterial coinfection	unspecific ward	NA	44	0.293333	0.0371743	44	8	0.181818	0.0581456	16	0.363636	0.0725204	2	0.0454545	0.0314022	8	0.181818	0.0581456	0	0	0
9	Bhaskaran	2022	India	detecting and monitoring the resistance profile against antibiotics in patients positive for COVID-19	patients positive for COVID-19	March ,2021 to June ,2021	retrospective cohort study	All COVID-19 patients	56	bacterial coinfection	unspecific ward	30-69	11	0.196429	0.053091	40	1	0.025	0.0246855	3	0.075	0.0416458	NA			2	0.05	0.0344601	5	0.125	0.0522913	2	0.05	0.0344601	5	0.125	0.0522913
11	Boorgula	2022	India	to ascertain the prevalence of the bacterial and fungal coinfections in COVID-19 patients, and also to assess the AMR patterns in the obtained isolates	COVID-19 positive patients	April 1, 2021 till May 31, 2021	retrospective cohort study	All COVID-19 patients	2259	bacterial coinfection	unspecific ward	mean 57.1	122	0.0540062	0.00475563	200	54	0.27	0.0313927	68	0.34	0.0334963	8	0.04	0.0138564	2	0.01	0.00703562	13	0.065	0.017432
13	Ceccarelli	2022	Italy	to estimate the incidence of superinfections in hospitalized subjects with COVID-19	patients with acute respiratory failure from SARS-CoV-2 infection	1 October 2020 - 28 February 2021	retrospective study	All COVID-19 patients	589	bacterial coinfection	unspecific ward	43-73	74	0.125637	0.0136567	84	NA			8	0.0952381	0.0320282	19	0.22619	0.0456472	5	0.0595238	0.0258154	20	0.238095	0.0464714
14	Contou	2020	France	assess the rate of bacterial and viral co-infections, as well as to report the most common micro-organisms involved in patients admitted to the ICU for severe SARS-CoV-2 pneumonia.	ICU for severe SARS-CoV-2	March 13th to April 16th 2020	retrospective study	All COVID-19 patients	92	co-infected with a pathogenic bacterium	ICU	55-70	26	0.282609	0.0469437	32	2	0.0625	0.0427908	2	0.0625	0.0427908	3	0.09375	0.051527	11	0.34375	0.0839617	2	0.0625	0.0427908	10	0.3125	0.0819382
15	Copaja-Corzo	2021	Peru	to evaluate the characteristics and impact of ICU-acquired infections in patients with COVID-19	patients with COVID-19	28 March 2020 to 1 March 2021	retrospective cohort study	All COVID-19 patients	124	healthcare-associated infection	ICU	mean 54.47	50	0.403226	0.0440523	50	27	0.54	0.070484	4	0.08	0.0383667	11	0.22	0.0585833	NA			NA
16	Cultrera	2021	Italy	examined microbial cultures performed in COVID-19-positive patients admitted to an ICU	COVID-19-positive patients	22 February to 30 April 2020	retrospective cohort study	All COVID-19 patients	28	bacterial coinfection	ICU	NA	28	1	0	120	17	0.141667	0.0318325	NA			3	0.025	0.0142522	5	0.0416667	0.0182416	NA			5	0.0416667	0.0182416				4	0.0333333	0.0163865
17	da Costa	2022	Brazil	to identify the frequency, types and etiology of bacterial infections in patients with COVID-19 admitted to an intensive care unit	patients with COVID-19 admitted to an intensive care unit	March - May 2020	retrospective cohort study	All COVID-19 patients	191	secondary infectious events	ICU	median 70.5	57	0.298429	0.0331085	97	28	0.28866	0.0460093	14	0.14433	0.0356817	22	0.226804	0.0425191	8	0.0824742	0.0279307	4	0.0412371	0.020189	4	0.0412371	0.020189	3	0.0309278	0.0175779	1	0.0103093	0.010256	NA			4	0.0412371	0.020189
18	Doubravská	2022	Czech Republic	to analyze whether/how the spectrum of bacterial pathogens and their resistance to antibiotics changed during the worst part of the COVID-19 pandemic	SARS-CoV-2-positive patients	1 November 2020 to 30 April 2021	retrospective cohort study	All COVID-19 patients	372	bacterial coinfection	ICU	18-97	372	1	0	1500	40	0.0266667	0.00415977	316	0.210667	0.0105289	115	0.0766667	0.00686969	45	0.03	0.00440454	38	0.0253333	0.00405722
19	Floridia	2022	Italy	to characterize the blood and lower respiratory tract infections in patients deceased with COVID-19 and the resistance profile of the microorganisms detected	patients with PCR-confirmed SARS-CoV-2 infection deceased in hospital	February 2020 to April 2021	retrospective cohort study	random sampling	157	superinfections	unspecific ward	median 71	121	0.770701	0.0335501	230	88	0.382609	0.0320475	64	0.278261	0.0295496	18	0.0782609	0.0177097	34	0.147826	0.0234032	14	0.0608696	0.0157652
20	Fontana	2021	Italy	to assess coinfection in COVID‑19 patients	COVID‑19 patients	March 2020 and June 2020	retrospective study	All COVID-19 patients	152	bacterial coinfection	ICU	average 65	93	0.611842	0.0395278	93	8	0.0860215	0.0290757	13	0.139785	0.0359577	21	0.225806	0.0433562	47	0.505376	0.0518446	11	0.11828	0.0334872
21	Foschi	2021	Italy	assessed respiratory bacterial coinfections in lower respiratory tract samples taken from intensive care unit-hospitalized COVID-19 patients	intensive care unit-hospitalized COVID-19 patients	10 March through 30 December 2020	retrospective study	All COVID-19 patients	178	bacterial coinfection	ICU	>18	178	1	0	110	8	0.0727273	0.0247603	16	0.145455	0.0336151	34	0.309091	0.0440613	15	0.136364	0.0327204	5	0.0454545	0.0198605	6	0.0545455	0.0216523	3	0.0272727	0.0155297
22	Gysin	2021	Switzerland	the bacterial spectrum and the antimicrobial susceptibility patterns of respiratory GNB isolated from ventilated ICU patients	COVID‑19 patients	March and May 2020	prospective observational study	All COVID-19 patients	40	gram negative	ICU	NA	19	0.475	0.0789581	168	NA			7	0.0416667	0.0154169	32	0.190476	0.0302957	NA			1	0.00595238	0.00593464
23	Jabir	2022	Iraq	to investigate secondary bacterial infections associated with the virus	COVID‑19 patients	February 2021-March 2021	prospective observational study	All COVID-19 patients	455	bacterial coinfection	unspecific ward	30-70	150	0.32967	0.0220383	150	96	0.64	0.0391918	NA			117	0.78	0.0338231	128	0.853333	0.0288855	NA
24	Jamnani	2022	Iran	investigated the presence of bacteria in endotracheal aspirate samples in severe COVID-19 patients under mechanical ventilation	severe COVID-19 patients under mechanical ventilation	20 February 2020 and 21 September 2020	retrospective cohort study	All COVID-19 patients	22	bacterial coinfection	ICU	40->70	22	1	0	22	9	0.409091	0.104824	1	0.0454545	0.0444095	2	0.0909091	0.0612909	1	0.0454545	0.0444095	1	0.0454545	0.0444095
25	Karataş	2021	Turkey	to evaluate the epidemiology and antimicrobial resistance (AMR) patterns of bacterial pathogens in COVID‑19 patients	COVID‑19 patients	March 15, 2020, and June 15, 2020	retrospective cohort study	All COVID-19 patients	1447	bacterial coinfection	unspecific ward	median 55 (0-100)	90	0.0621977	0.00634904	123	12	0.097561	0.0267544	15	0.121951	0.0295053	8	0.0650407	0.022235	11	0.0894309	0.0257305	22	0.178862	0.0345553	2	0.0162602	0.0114038	11	0.0894309	0.0257305	6	0.0487805	0.0194228							1	0.00813008	0.00809696
26	Karruli	2021	Italy	to assess the drivers of multidrug-resistant (MDR) bacterial infection development in coronavirus disease 2019	COVID‑19 patients	March to May 2020	retrospective cohort study	All COVID-19 patients	32	multidrug-resistant (MDR) bacterial infection	ICU	median 68 (55-75)	16	0.5	0.0883883	23	4	0.173913	0.0790342	8	0.347826	0.0993113	3	0.130435	0.0702237	1	0.0434783	0.0425226	NA			1	0.0434783	0.0425226	2	0.0869565	0.0587534	8	0.347826	0.0993113	4	0.173913	0.0790342	3	0.130435	0.0702237
27	Khurana	2021	India	ascertain the prevalence and profiles of co- & secondary infections in patients at the COVID-19 facility in North India	COVID-19 patients	April 3 to July 11, 2020	retrospective record review	All COVID-19 patients	1179	secondary infection pathogens	unspecific ward	mean 46.01	175	0.148431	0.0103542	151	26	0.172185	0.0307239	32	0.211921	0.033257	11	0.0728477	0.0211492	NA			16	0.10596	0.0250473
28	Kubin	2021	US	to identify incidence, antimicrobial susceptibilities, and outcomes associated with bacterial/fungal secondary infections in a large cohort of patients with COVID-19	COVID‑19 patients	2 March and 31 May 2020	retrospective cohort study	All COVID-19 patients	3028	bacterial coinfection	unspecific ward	>18	533	0.176024	0.00692094	854	NS			NS			NS			116	0.135831	0.0117239	NA			38	0.0444965	0.00705586				27	0.0316159	0.00598753							18	0.0210773	0.00491533
29	Li	2020	China	to obtain the etiology and antimicrobial resistance of SBIs for more accurate antimicrobial use	patients hospitalized with coronavirus disease 2019	January 27 and March 17, 2020	retrospective cohort study	All COVID-19 patients	1495	secondary bacterial infections	unspecific ward	mean 66.2 (30-93)	102	0.0682274	0.00652099	159	57	0.358491	0.0380314	49	0.308176	0.0366183	7	0.0440252	0.0162695	3	0.0188679	0.0107901	8	0.0503145	0.0173356				49	0.308176	0.0366183	32	0.201258	0.0317966	47	0.295597	0.0361878
30	Lingscheid	2022	Berlin	To investigate antimicrobial use and primary and nosocomial infections in hospitalized COVID-19 patients	hospitalized COVID-19 patients	March and November 2020	Prospective observational cohort study	All COVID-19 patients	309	primary and nosocomial infections	unspecific ward	adult	91	0.294498	0.0259305	159	8	0.0503145	0.0173356	5	0.0314465	0.0138404	8	0.0503145	0.0173356	2	0.0125786	0.00883831	8	0.0503145	0.0173356										8	0.0503145	0.0173356				4	0.0251572	0.0124194
31	Mahmoudi	2020	Iran	to determine the prevalence of bacterial infections and antibiotic resistance in patients with coronavirus disease	patients with coronavirus disease	February 17, 2020 to October 20, 2020	cross-sectional study	All COVID-19 patients	340	secondary bacterial infection	unspecific ward	NA	43	0.126471	0.0180258	43	NA			NS			4	0.0930233	0.0442955	15	0.348837	0.0726812	7	0.162791	0.0562986	6	0.139535	0.0528413
32	Mazzariol	2021	Italy	To investigate the presence of bacteria and fungi in bronchial aspirate (BA) samples from 43 mechanically ventilated patients with severe COVID-19 disease	patients with severe COVID-19 disease	March and April 2020	Prospective observational cohort study	All COVID-19 patients	43	Bacterial superinfection	ICU	average 61.4	25	0.581395	0.0752322	17	NA			13	0.764706	0.102879	17	1	0	NA			1	0.0588235	0.0570672				3	0.176471	0.0924594	8	0.470588	0.121058				11	0.647059	0.115904
33	Moradi	2021	Iran	to evaluate co-infections in COVID-19 patients regarding drug resistance	COVID-19 patients	February 2019 to February 2020	cross-sectional study	All COVID-19 patients	5530	Bacterial co-infections	unspecific ward	NA	346	0.0625678	0.00325674	346	82	0.236994	0.022861	71	0.205202	0.0217111	22	0.0635838	0.0131181	8	0.0231214	0.00807959	68	0.196532	0.021363
34	Nori	2021	US	observed bacterial or fungal coinfections in COVID-19 patients	COVID-19 patients	March 1 and April 18, 2020	retrospective observational study	All COVID-19 patients	4267	Bacterial co-infections	unspecific ward	median 62 (52-72)	152	0.0356222	0.00283741	267	NA			16	0.0599251	0.0145255	27	0.101124	0.018451	93	0.348315	0.0291574	15	0.0561798	0.0140922	43	0.161049	0.0224953				10	0.0374532	0.0116198
35	Palanisamy	2021	India	to assess the prevalence, clinical profile and outcome of BSIs in critically ill COVID-19 patients	COVID-19 patients	July 2020 to December 2021	retrospective cohort study	All COVID-19 patients	750	Bloodstream infections	ICU	median 62 (51-72)	64	0.0853333	0.0102014	64	21	0.328125	0.0586913	14	0.21875	0.0516748	4	0.0625	0.0302577	NA			7	0.109375	0.0390136
36	Posteraro	2021	Italy	assessed the agreement of FA-PP panel results with those of culture-based standard-of-care (SoC) methods and the impact of FA-PP panel results on antimicrobial therapy management in patients with bacterial pneumonia	COVID-19 patients hospitalized in our ICU	September 2020 to March 2021	Prospective observational cohort study	All COVID-19 patients	150	bacterial pneumonia	ICU	NA	97	0.646667	0.039029	180	53	0.294444	0.0339728	23	0.127778	0.0248831	19	0.105556	0.0229024	45	0.25	0.0322749	15	0.0833333	0.0206006	23	0.127778	0.0248831							53	0.294444	0.0339728
38	Pourajam	2022	Iran	to determine the frequency of secondary bacterial infection, antibiotic use, and clinical characteristics in patients admitted to the ICU with severe SARS-CoV-2 pneumonia	COVID-19 patients	March 6 to September 7	retrospective cohort study	All COVID-19 patients	553	Secondary Bacterial Infection	ICU	mean 69.4 (21-95)	65	0.117541	0.0136955	86	33	0.383721	0.0524381	44	0.511628	0.0539018	1	0.0116279	0.0115601	NA			NA
39	Protonotariou	2021	Greece	microbiological characteristics of bacteremias in confirmed cases of hospitalized COVID-19 patients were determined	COVID-19 patients	September and December 2020	retrospective observational study	All COVID-19 patients	1165	bloodstream infection	unspecific ward	median 64	122	0.104721	0.00897084	166	51	0.307229	0.0358073	45	0.271084	0.0345014	9	0.0542169	0.0175756	3	0.0180723	0.0103393	NA			2	0.0120482	0.00846788							51	0.307229	0.0358073				9	0.0542169	0.0175756
40	Ramadan	2020	Egypt	demonstrate, for the first time, the clinical, laboratory and radiological characteristics of coronavirus disease 2019 (COVID-19) patients, to identify the predictors of severity and to describe the antimicrobial resistance profile in patients from Upper Egypt	COVID-19 patients	3rd of May and the 30th of June	prospective study	All COVID-19 patients	260	Bacterial co-infections	unspecific ward	<1->71	28	0.107692	0.0192249	42	4	0.0952381	0.0452947	7	0.166667	0.0575055	2	0.047619	0.0328603	5	0.119048	0.0499703	4	0.0952381	0.0452947
41	Rao	2022	India	to unravel the causative pathogens, their sensitivity/resistance patterns, and their impact on the outcome of long COVID presentations	long COVID-19 patients	April to October 2021	retrospective observational study	All COVID-19 patients	84	Bacterial co-infections	unspecific ward	>18	32	0.380952	0.0529856	33	5	0.151515	0.0624156	10	0.30303	0.0800006	6	0.181818	0.0671408	1	0.030303	0.0298404	2	0.0606061	0.041536
42	Rizvi	2022	Pakistan	the prevalence of bacterial co-infections and their antibiotic susceptibility patterns	COVID-19 patients	24 July 2021 to 31 October 2021	Prospective observational study	All COVID-19 patients	1251	Bacterial co-infections	unspecific ward	<30->50	234	0.18705	0.0110251	234	47	0.200855	0.0261906	35	0.149573	0.0233151	38	0.162393	0.0241099	10	0.042735	0.0132221	62	0.264957	0.0288494
43	Said	2022	Saudi Arabia	studied the types, frequency, antibiogram, case fatality rates (CFR), and clinical profiles of co-infecting-pathogens in 301 COVID-19 patients	COVID-19 patients	18 August 2020 and 22 October 2020	retrospective cross-sectional study	All COVID-19 patients	301	Bacterial co-infections	ICU	1989-10-01	129	0.428571	0.0285239	129	34	0.263566	0.0387897	48	0.372093	0.0425577	11	0.0852713	0.0245897	NA			24	0.186047	0.0342622
45	Sathyakamala	2022	India	to obtain the etiology and antimicrobial resistance profile of bacterial isolates causing secondary bacterial infections in COVID-19 patients admitted in the ICU	COVID-19 patients admitted in the ICU	May to October 2020	retrospective observational study	All COVID-19 patients	356	secondary bacterial infections	ICU	NA	312	0.876404	0.0174433	180	NA			NA			NA			2	0.0111111	0.00781297	60	0.333333	0.0351364
46	Sharifipour	2020	Iran	to evaluate secondary bacterial infections and their antibiotic resistance in COVID-19 positive patients admitted to ICUs	COVID-19 patients admitted to ICUs	NA	Prospective observational study	All COVID-19 patients	19	secondary bacterial infections	ICU	mean 67.1 (38-92	19	1	0	19	17	0.894737	0.0704059	NA			NA			2	0.105263	0.0704059	NA			1	0.0526316	0.0512278							NS
47	Sharma	2021	India	to highlight the overall burden of these infections in COVID-19 patients admitted to our tertiary care hospital, along with their antibiotic susceptibility patterns	COVID-19 patients	May 1, 2020 to October 31, 2020	prospective, observational study	All COVID-19 patients	814	secondary bacterial infections & Bacterial co-infections	unspecific ward	mean 48	146	0.179361	0.0134471	143	49	0.342657	0.0396879	26	0.181818	0.0322534	13	0.0909091	0.0240403	13	0.0909091	0.0240403	13	0.0909091	0.0240403	5	0.034965	0.015361				17	0.118881	0.0270649	32	0.223776	0.0348524				3	0.020979	0.0119845
48	Sinto	2022	Indonesia	investigated epidemiology of AMR bloodstream infections (BSI) before and during the COVID-19 pandemic in the Indonesian national referral hospital	COVID-19 patients	1 January 2019 to 31 December 2020	retrospective hospital-wide surveillance	All COVID-19 patients	1311	bloodstream infections	unspecific ward	NA	101	0.0770404	0.0073646	57	NS			10	0.175439	0.0503775	5	0.0877193	0.0374692	3	0.0526316	0.0295764	9	0.157895	0.048298							5	0.0877193	0.0374692	2	0.0350877	0.0243716
49	Son	2021	Korea	Risk factors for isolation of MDROs were then evaluated	patients with confirmed COVID-19 pneumonia	February 2020 and May 2020	retrospective cohort study	All COVID-19 patients	152	Superimposed multi-drug resistant organisms (MDROs) co-infection	unspecific ward	mean 68 (62-77)	13	0.0855263	0.0226837	20	3	0.15	0.0798436	2	0.1	0.067082	3	0.15	0.0798436	4	0.2	0.0894427	3	0.15	0.0798436	4	0.2	0.0894427	2	0.1	0.067082	1	0.05	0.048734	3	0.15	0.0798436	3	0.15	0.0798436	2	0.1	0.067082
50	Suarez-de-laRica	2021	Spain	to investigate the rate of secondary infections, risk factors for secondary infections and risk factors for mortality in COVID-19 critically ill patients	COVID-19 critically ill patients	16th of March 2020 and 17th of May 2020.	retrospective study	All COVID-19 patients	107	secondary infections	CCU	mean 62.2	46	0.429907	0.0478595	84	NA			NA			13	0.154762	0.0394623	14	0.166667	0.0406625	8	0.0952381	0.0320282	5	0.0595238	0.0258154	11	0.130952	0.0368077	1	0.0119048	0.0118337
51	Temperoni	2021	Italy	evaluated the prevalence of antibiotic resistance among opportunistic pathogens isolated from patients with COVID-19 under mechanical ventilation	ICU COVID-19 patients	1 February 2021 to 31 May 2021	retrospective observational study	All COVID-19 patients	89	bacterial infection	ICU	>18	68	0.764045	0.0450069	73	16	0.219178	0.0484187	12	0.164384	0.0433782	6	0.0821918	0.0321461	29	0.39726	0.0572718	31	0.424658	0.0578524	6	0.0821918	0.0321461	8	0.109589	0.0365609				12	0.164384	0.0433782	4	0.0547945	0.0266361
53	Vijay	2021	India	reports the prevalence and profiles of secondary infections (SIs) and clinical outcomes in hospitalized COVID-19 patients in India	COVID-19 patients	June and August 2020	retrospective observational study	All COVID-19 patients	17534	secondary infections	unspecific ward	mean 53.3	640	0.0365005	0.00141623	1006	212	0.210736	0.0128582	295	0.293241	0.0143532	97	0.0964215	0.00930617	33	0.0328032	0.00561586	83	0.082505	0.00867447	13	0.0129225	0.00356081	284	0.282306	0.0141916
54	Zeshan	2022	Pakistan	the prevalence of bacterial infections and AMR rates and other comorbidities with mortality rates in COVID-19 patients who were admitted to SICUs	COVID-19 patients admitted in surgical intensive care units (SICUs)	2 August 2021 to 31 October 2021	prospective, observational study	All COVID-19 patients	856	bacterial infections	ICU	1->80	342	0.399533	0.0167411	342	49	0.143275	0.0189449	84	0.245614	0.0232761	51	0.149123	0.0192616	24	0.0701754	0.0138127	98	0.28655	0.0244494	4	0.0116959	0.00581365				21	0.0614035	0.0129814							1	0.00292398	0.0029197
